# Supplementary material for: The current burden of Japanese encephalitis and the estimated impacts of vaccination: Combining estimates of the spatial distribution and transmission intensity of a zoonotic pathogen
Source: PubMed Central journal article supplement (PMC8544850; doi:10.1371/journal.pntd.0009385), 2021-10-13
Supplement: pntd.0009385.s001.pdf [file pntd.0009385.s001.pdf]

**Table S1. Summary information and results for studies of age-specific Japanese Encephalitis (JE) incidence used to estimate the annual force of infection (FOI).** Results are the median posterior FOI estimates with 95% credible interval. Vaccination coverage was assumed to be 0 for studies without a vaccination data source.

| Country     | Study period | FOI (95% CrI)         | Incidence data | Vaccination data                                            |
|-------------|--------------|-----------------------|----------------|-------------------------------------------------------------|
| Bangladesh  | 2007-2008    | 0.148 (0.087 - 0.195) | [23]           |                                                             |
| Cambodia    | 2006-2008    | 0.067 (0.026 - 0.107) | [28]           |                                                             |
| Cambodia    | 2010-2013    | 0.096 (0.064 - 0.129) | [6]            |                                                             |
| China       | 2004-2014    | 0.083 (0.041 - 0.128) | [12]           | 2000-2014: [30]                                             |
| China       | 2000-2005    | 0.193 (0.130 - 0.244) | [29]           | 2000-2005: [30]                                             |
| India       | 2008-2012    | 0.164 (0.044 - 0.325) | [26]           | 2006-2012: [30]                                             |
| India       | 2000-2002    | 0.056 (0.047 - 0.066) | [24]           |                                                             |
| India       | 2011-2013    | 0.162 (0.038 - 0.279) | [8]            | 2006-2013: [30]                                             |
| Indonesia   | 2001-2003    | 0.197 (0.116 - 0.284) | [10]           |                                                             |
| Indonesia   | 2005-2006    | 0.366 (0.289 - 0.457) | [20]           |                                                             |
| Japan       | 1982-2004    | 0.006 (0.000 - 0.016) | [1]            | 1976-2004: [25]                                             |
| Laos        | 2001-2008    | 0.040 (0.021 - 0.063) | [16]           |                                                             |
| Malaysia    | 2006-2013    | 0.050 (0.027 - 0.071) | [17]           | 2001-2013: [30]                                             |
| Malaysia    | 1997-2001    | 0.289 (0.229 - 0.372) | [32]           |                                                             |
| Nepal       | 2004-2006    | 0.059 (0.055 - 0.063) | [31]           |                                                             |
| Nepal       | 1996-1997    | 0.071 (0.068 - 0.074) | [9]            |                                                             |
| Nepal       | 2006         | 0.084 (0.055 - 0.118) | [22]           |                                                             |
| Nepal       | 2007         | 0.161 (0.128 - 0.200) | [2]            |                                                             |
| Nepal       | 2004-2006    | 0.125 (0.120 - 0.131) | [21]           |                                                             |
| Philippines | 2011-2014    | 0.178 (0.152 - 0.206) | [13]           |                                                             |
| Philippines | 2002-2004    | 0.044 (0.027 - 0.064) | [18]           |                                                             |
| Philippines | 1984         | 0.200 (0.162 - 0.245) | [14]           |                                                             |
| South Korea | 2001-2014    | 0.006 (0.000 - 0.031) | [11]           | 1963-1999: [15], [27]<br>2000-2005: [25]<br>2006-2014: [30] |
| Sri Lanka   | 2006-2010    | 0.020 (0.004 - 0.042) | [5]            | 1988-2008: [25]<br>2008-2010: Gavi                          |
| Taiwan      | 2000-2014    | 0.007 (0.000 - 0.033) | [3]            | 1969-2014: [7], [15]                                        |
| Thailand    | 2003-2005    | 0.045 (0.013 - 0.081) | [19]           | 1990-2005: [19], [25]                                       |
| Vietnam     | 1998-2007    | 0.105 (0.046 - 0.258) | [33]           | 1997-2005: [4]<br>2006-2007: [30]                           |

## References

1. Arai, S., Matsunaga, Y., Takasaki, T., Tanaka-Taya, K., Taniguchi, K., Okabe, N., Kurane, I., Japan, V.P.D.S.P. of, 2008. Japanese encephalitis: surveillance and elimination effort in Japan from 1982 to 2004. *Jpn J Infect Dis* 61, 333–338.
2. Bhattachan, A., Amatya, S., Sedai, T.R., Upreti, S.R., Partridge, J., 2009. Japanese Encephalitis in Hill and Mountain Districts, Nepal. *Emerg Infect Dis* 15, 1691–1692. <https://doi.org/10.3201/eid1510.081641>
3. Chang, Y.-K., Chang, H.-L., Wu, H.-S., Chen, K.-T., 2017. Epidemiological Features of Japanese Encephalitis in Taiwan from 2000 to 2014. *The American Journal of Tropical Medicine and Hygiene* 96, 382–388. <https://doi.org/10.4269/ajtmh.16-0330>
4. Choisy, M., 2017. Vaccine coverages from the WHO EPI in Vietnam [WWW Document]. URL <https://github.com/choisy/epiVN> (accessed 12.7.20).
5. Epidemiology unit MoH, S.L., 2012. Japanese Encephalitis: a manual for Medical Officers of Health. Ministry of Health.
6. Horwood, P.F., Duong, V., Laurent, D., Mey, C., Sothy, H., Santy, K., Richner, B., Heng, S., Hem, S., Cheval, J., Gorman, C., Dussart, P., de Jong, M.D., Kerleguer, A., Guillard, B., Murgue, B., Lecuit, M., de Lamballerie, X., Farrar, J.J., Tarantola, A., Eloit, M., Buchy, P., 2017. Aetiology of acute meningoencephalitis in Cambodian children, 2010–2013. *Emerging Microbes & Infections* 6, e35. <https://doi.org/10.1038/emi.2017.15>
7. Hsu, L.-C., Chen, Y.-J., Hsu, F.-K., Huang, J.-H., Chang, C.-M., Chou, P., Lin, I.-F., Chang, F.-Y., 2014. The Incidence of Japanese Encephalitis in Taiwan—A Population-Based Study. *PLoS Negl Trop Dis* 8. <https://doi.org/10.1371/journal.pntd.0003030>
8. Jain, P., Singh, A.K., Khan, D.N., Pandey, M., Kumar, R., Garg, R., Jain, A., 2016. Trend of Japanese encephalitis in Uttar Pradesh, India from 2011 to 2013. *Epidemiology & Infection* 144, 363–370. <https://doi.org/10.1017/S0950268815000928>
9. Joshi, D.D., 2007. Epidemiological Profile of Japanese Encephalities in Nepal 1996-1997. *Journal of Institute of Medicine* 22.
10. Kari, K., Liu, W., Gautama, K., Mammen, M.P., Clemens, J.D., Nisalak, A., Subrata, K., Kim, H.K., Xu, Z.-Y., 2006. A hospital-based surveillance for Japanese encephalitis in Bali, Indonesia. *BMC Med* 4, 8. <https://doi.org/10.1186/1741-7015-4-8>
11. Lee, E.J., Cha, G.-W., Ju, Y.R., Han, M.G., Lee, W.-J., Jeong, Y.E., 2016. Prevalence of Neutralizing Antibodies to Japanese Encephalitis Virus among High-Risk Age Groups in South Korea, 2010. *PLOS ONE* 11, e0147841. <https://doi.org/10.1371/journal.pone.0147841>
12. Li, X., Cui, S., Gao, X., Wang, H., Song, M., Li, M., Fu, S., Lv, Z., He, Y., Lei, W., Wang, B., Lu, X., Liang, G., 2016. The Spatio-temporal Distribution of Japanese Encephalitis Cases in Different Age Groups in Mainland China, 2004 – 2014. *PLOS Neglected Tropical Diseases* 10, e0004611. <https://doi.org/10.1371/journal.pntd.0004611>
13. Lopez, A.L., Aldaba, J.G., Jr, V.G.R., Iii, A.O.T., Sy, A.K., Espino, F.E., DeQuiroz-Castro, M., Jee, Y., Ducusin, M.J., Fox, K.K., 2015. Epidemiology of Japanese Encephalitis in the Philippines: A Systematic Review. *PLOS Neglected Tropical Diseases* 9, e0003630. <https://doi.org/10.1371/journal.pntd.0003630>
14. Luis, A.S., Hayes, C.G., Manaloto, C.R., n.d. The Neurologic Features of Japanese Encephalitis in the Philippines.
15. Monath, T.P., 2002. Japanese Encephalitis Vaccines: Current Vaccines and Future Prospects, in: Mackenzie, J.S., Barrett, A.D.T., Deubel, V. (Eds.), *Japanese Encephalitis and West Nile Viruses, Current Topics in Microbiology and Immunology*. Springer, Berlin, Heidelberg, pp. 105–138. [https://doi.org/10.1007/978-3-642-59403-8\\_6](https://doi.org/10.1007/978-3-642-59403-8_6)
16. Moore, C.E., Blacksell, S.D., Taojaikong, T., Jarman, R.G., Gibbons, R.V., Lee, S.J., Chansamouth, V., Thongpaseuth, S., Mayxay, M., Newton, P.N., 2012. A prospective assessment of the accuracy of commercial IgM ELISAs in diagnosis of Japanese encephalitis virus infections in patients with

- suspected central nervous system infections in Laos. *Am. J. Trop. Med. Hyg.* 87, 171–178. <https://doi.org/10.4269/ajtmh.2012.11-0729>
17. Mustapa, N.I., Saraswathy, T.S., Ruslan, N.A.M., Kassim, F.M., Saat, Z., 2016. Japanese Encephalitis in Malaysia: Review of laboratory data from 2006 to 2013. *Southeast Asian Journal of Tropical Medicine and Public Health* 47, 759–765.
  18. Natividad, F.F., Daroy, M.L.G., Alonzo, M.T., Matias, R.R., Suarez, L. a. C., Inoue, S., 2006. Use of IgM-capture ELISA for confirmation of Japanese encephalitis infections in the Philippines. *Southeast Asian J. Trop. Med. Public Health* 37 Suppl 3, 136–139.
  19. Olsen, S.J., Supawat, K., Campbell, A.P., Anantapreecha, S., Liamsuwan, S., Tunlayadechanont, S., Visudtibhan, A., Lupthikulthum, S., Dhiravibulya, K., Viriyavejakul, A., Vasiknanonte, P., Rajborirug, K., Watanaveeradej, V., Nabangchang, C., Laven, J., Kosoy, O., Panella, A., Ellis, C., Hanchaichon, S., Khetsuriani, N., Powers, A.M., Dowell, S.F., Fischer, M., 2010. Japanese encephalitis virus remains an important cause of encephalitis in Thailand. *International Journal of Infectious Diseases* 14, e888–e892. <https://doi.org/10.1016/j.ijid.2010.03.022>
  20. Ompusunggu, S., Hills, S.L., Maha, M.S., Moniaga, V.A., Susilarini, N.K., Widjaya, A., Sasmito, A., Suwandono, A., Sedyaningsih, E.R., Jacobson, J.A., 2008. Confirmation of Japanese encephalitis as an endemic human disease through sentinel surveillance in Indonesia. *Am. J. Trop. Med. Hyg.* 79, 963–970.
  21. Pant, S.D., 2009. Epidemiology of Japanese encephalitis in Nepal. *Journal of Nepal Paediatric Society* 29, 35–37.
  22. Partridge, J., Ghimire, P., Sedai, T., Bista, M.B., Banerjee, M., 2007. Endemic Japanese Encephalitis in the Kathmandu Valley, Nepal. *The American Journal of Tropical Medicine and Hygiene* 77, 1146–1149. <https://doi.org/10.4269/ajtmh.2007.77.1146>
  23. Paul, R.C., Rahman, M., Gurley, E.S., Hossain, M.J., Diorditsa, S., Hasan, A.M., Banu, S.S., Alamgir, A.S.M., Rahman, M.A., Sandhu, H., Fischer, M., Luby, S.P., 2011. A Novel Low-Cost Approach to Estimate the Incidence of Japanese Encephalitis in the Catchment Area of Three Hospitals in Bangladesh. *The American Journal of Tropical Medicine and Hygiene* 85, 379–385. <https://doi.org/10.4269/ajtmh.2011.10-0706>
  24. Phukan, A.C., Borah, P.K., Mahanta, J., 2004. Japanese encephalitis in Assam, northeast India. *Southeast Asian J. Trop. Med. Public Health* 35, 618–622.
  25. Quan, T.M., Thao, T.T.N., Duy, N.M., Nhat, T.M., Clapham, H., 2020. Estimates of the global burden of Japanese encephalitis and the impact of vaccination from 2000–2015. *eLife* 9, e51027. <https://doi.org/10.7554/eLife.51027>
  26. Ranjan, P., Gore, M., Selvaraju, S., Kushwaha, K.P., Srivastava, D.K., Murhekar, M., 2014. Changes in acute encephalitis syndrome incidence after introduction of Japanese encephalitis vaccine in a region of India. *Journal of Infection* 69, 200–202. <https://doi.org/10.1016/j.jinf.2014.03.013>
  27. Sohn, Y.M., 2000. Japanese Encephalitis Immunization in South Korea: Past, Present, and Future. *Emerging Infectious Diseases* 6, 8.
  28. Touch, S., Hills, S., Sokhal, B., Samnang, C., Sovann, L., Khieu, V., Soeung, S.C., Toda, K., Robinson, J., Grundy, J., 2009. Epidemiology and burden of disease from Japanese encephalitis in Cambodia: results from two years of sentinel surveillance. *Tropical Medicine & International Health* 14, 1365–1373. <https://doi.org/10.1111/j.1365-3156.2009.02380.x>
  29. Wang, H., Li, Y., Liang, X., Liang, G., 2009. Japanese encephalitis in mainland china. *Jpn. J. Infect. Dis.* 62, 331–336.
  30. WHO, 2020. WHO World Health Organization: Immunization, Vaccines And Biologicals. Vaccine preventable diseases Vaccines monitoring system 2020 Global Summary Reference Time Series: JAPENC [WWW Document]. URL [https://apps.who.int/immunization\\_monitoring/globalsummary/timeseries/tscoveragejapenc.html](https://apps.who.int/immunization_monitoring/globalsummary/timeseries/tscoveragejapenc.html) (accessed 1.5.21).
  31. Wierzba, T.F., Ghimire, P., Malla, S., Banerjee, M.K., Shrestha, S., Khanal, B., Sedai, T.R., Gibbons, R.V., 2008. Laboratory-based Japanese Encephalitis Surveillance in Nepal and the Implications for a

National Immunization Strategy. *The American Journal of Tropical Medicine and Hygiene* 78, 1002–1006. <https://doi.org/10.4269/ajtmh.2008.78.1002>

32. Wong, S.C., Ooi, M.H., Abdullah, A.R., Wong, S.Y., Krishnan, S., Tio, P.H., Pek, P.C., Lai, B.F., Mohan, A., Muhi, J., Kiyu, A., Arif, M.T., Cardoso, M.J., 2008. A decade of Japanese encephalitis surveillance in Sarawak, Malaysia: 1997–2006. *Tropical Medicine & International Health* 13, 52–55. <https://doi.org/10.1111/j.1365-3156.2007.01967.x>
33. Yen, N.T., Duffy, M.R., Hong, N.M., Hien, N.T., Fischer, M., Hills, S.L., 2010. Surveillance for Japanese Encephalitis in Vietnam, 1998–2007. *The American Journal of Tropical Medicine and Hygiene* 83, 816–819. <https://doi.org/10.4269/ajtmh.2010.10-0262>
