# Supplementary material for: The current burden of Japanese encephalitis and the estimated impacts of vaccination: Combining estimates of the spatial distribution and transmission intensity of a zoonotic pathogen
Source: PubMed Central journal article supplement (PMC8544850; doi:10.1371/journal.pntd.0009385), 2021-10-13
Supplement: pntd.0009385.s002.pdf [file pntd.0009385.s002.pdf]

**Table S2. Summary of vaccination coverage data used to estimate the burden of Japanese encephalitis (JE) from 2010-2019 for each country.** Countries without details were assumed to have a vaccination coverage of 0.

| <b>Country</b>   | <b>Start</b> | <b>End</b> | <b>Source</b>    |
|------------------|--------------|------------|------------------|
| Bangladesh       |              |            |                  |
| Bhutan           |              |            |                  |
| Brunei           |              |            |                  |
| Cambodia         | 2013         | 2019       | [10], [12], [14] |
| China            | 2008         | 2019       | [14]             |
| East Timor       |              |            |                  |
| India            | 2006         | 2019       | [10], [14]       |
| Indonesia        | 2018         | 2019       | [3], [14]        |
| Japan            | 1976         | 2006       | [10]             |
|                  | 2007         | 2019       | [14]             |
| Laos             | 2015         | 2016       | [5]              |
| Malaysia         | 2001         | 2019       | [14]             |
| Myanmar          | 2017         | 2019       | [13], [14]       |
| Nepal            | 2005         | 2019       | [6], [7], [14]   |
| North Korea      | 2009         | 2014       | [4]              |
| Pakistan         |              |            |                  |
| Papua New Guinea |              |            |                  |
| Philippines      |              |            |                  |
| Singapore        |              |            |                  |
| South Korea      | 1963         | 1999       | [8], [11]        |
|                  | 2000         | 2005       | [10]             |
|                  | 2006         | 2019       | [14]             |
| Sri Lanka        | 1988         | 2008       | [10]             |
|                  | 2009         | 2019       | [14]             |
| Taiwan           | 1968         | 2019       | [2], [8]         |
| Thailand         | 1990         | 2015       | [9], [10]        |
|                  | 2016         | 2019       | [14]             |
| Vietnam          | 1997         | 2005       | [1]              |
|                  | 2006         | 2019       | [14]             |

## References

1. Choisy, M., 2017. Vaccine coverages from the WHO EPI in Vietnam [WWW Document]. URL <https://github.com/choisy/epiVN> (accessed 12.7.20).
2. Hsu, L.-C., Chen, Y.-J., Hsu, F.-K., Huang, J.-H., Chang, C.-M., Chou, P., Lin, I.-F., Chang, F.-Y., 2014. The Incidence of Japanese Encephalitis in Taiwan—A Population-Based Study. *PLoS Negl Trop Dis* 8. <https://doi.org/10.1371/journal.pntd.0003030>
3. Im, J., Balasubramanian, R., Yastini, N.W., Suwarba, I.G.N., Andayani, A.R., Bura, V., Jeon, H.J., Clemens, J.D., Marks, F., 2018. Protecting children against Japanese encephalitis in Bali, Indonesia. *The Lancet* 391, 2500–2501. [https://doi.org/10.1016/S0140-6736\(18\)31191-7](https://doi.org/10.1016/S0140-6736(18)31191-7)
4. Marks, F., Nyambat, B., Xu, Z.-Y., von Kalckreuth, V., Kilgore, P.E., Seo, H.J., Du, Y., Park, S.E., Im, J., Konings, F., Meyer, C.G., Wierzba, T.F., Clemens, J.D., 2015. Vaccine introduction in the Democratic People’s Republic of Korea. *Vaccine* 33, 2297–2300. <https://doi.org/10.1016/j.vaccine.2015.03.005>
5. Ministry of Health, Laos. 2016. Japanese encephalitis SIA 2015 technical report.
6. Ministry of Health, Nepal. 2016. Japanese encephalitis vaccination campaign, Nepal. Technical Report. WHO-UNICEF Joint Reporting.
7. Mithila Public Health Services, Nepal. 2016. Coverage survey of Japanese encephalitis vaccine mass vaccination campaign in selected districts of Nepal.
8. Monath, T.P., 2002. Japanese Encephalitis Vaccines: Current Vaccines and Future Prospects, in: Mackenzie, J.S., Barrett, A.D.T., Deubel, V. (Eds.), *Japanese Encephalitis and West Nile Viruses, Current Topics in Microbiology and Immunology*. Springer, Berlin, Heidelberg, pp. 105–138. [https://doi.org/10.1007/978-3-642-59403-8\\_6](https://doi.org/10.1007/978-3-642-59403-8_6)
9. Olsen, S.J., Supawat, K., Campbell, A.P., Anantapreecha, S., Liamsuwan, S., Tunlayadechanont, S., Visudtibhan, A., Lupthikulthum, S., Dhiravibulya, K., Viriyavejakul, A., Vasikananont, P., Rajborirug, K., Watanaveeradej, V., Nabangchang, C., Laven, J., Kosoy, O., Panella, A., Ellis, C., Henchaichon, S., Khetsuriani, N., Powers, A.M., Dowell, S.F., Fischer, M., 2010. Japanese encephalitis virus remains an important cause of encephalitis in Thailand. *International Journal of Infectious Diseases* 14, e888–e892. <https://doi.org/10.1016/j.ijid.2010.03.022>
10. Quan, T.M., Thao, T.T.N., Duy, N.M., Nhat, T.M., Clapham, H., 2020. Estimates of the global burden of Japanese encephalitis and the impact of vaccination from 2000-2015. *eLife* 9, e51027. <https://doi.org/10.7554/eLife.51027>
11. Sohn, Y.M., 2000. Japanese Encephalitis Immunization in South Korea: Past, Present, and Future. *Emerging Infectious Diseases* 6, 8.
12. WHO, 2016. Global Immunization News. March, 2016. URL: [https://www.who.int/immunization/GIN\\_March\\_2016.pdf](https://www.who.int/immunization/GIN_March_2016.pdf) (accessed 4.6.21)
13. WHO, 2018. Japanese encephalitis vaccination campaign achievement [WWW Document]. URL: <https://www.who.int/myanmar/our-work/japanese-encephalitis-vaccination-campaign-achievement> (accessed 4.6.21).
14. WHO, 2020. WHO World Health Organization: Immunization, Vaccines And Biologicals. Vaccine preventable diseases Vaccines monitoring system 2020 Global Summary Reference Time Series: JAPENC [WWW Document]. URL: [https://apps.who.int/immunization\\_monitoring/globalsummary/timeseries/tscoveragejapenc.html](https://apps.who.int/immunization_monitoring/globalsummary/timeseries/tscoveragejapenc.html) (accessed 1.5.21).
