# Supplementary material for: The current burden of Japanese encephalitis and the estimated impacts of vaccination: Combining estimates of the spatial distribution and transmission intensity of a zoonotic pathogen
Source: PubMed Central journal article supplement (PMC8544850; doi:10.1371/journal.pntd.0009385), 2021-10-13
Supplement: pntd.0009385.s003.pdf [file pntd.0009385.s003.pdf]

**Table S3. Mean annual number of JE cases (C) and deaths (D) per country from 2010 to 2019 under the vaccination and no vaccination scenarios.** Numbers are presented for three different estimates of the at-risk population size - baseline, low, and high. See Methods for description of how these population sizes were estimated.

| Country          |   | Vaccination          |                      |                        | No Vaccination         |                        |                        |
|------------------|---|----------------------|----------------------|------------------------|------------------------|------------------------|------------------------|
|                  |   | Baseline (95% CI)    | Low (95% CI)         | High (95% CI)          | Baseline (95% CI)      | Low (95% CI)           | High (95% CI)          |
| Bangladesh       | C | 10207 (3187 - 33585) | 10152 (3176 - 33411) | 12000 (3755 - 39511)   | 10207 (3193 - 33477)   | 10152 (3184 - 33391)   | 12001 (3764 - 39333)   |
|                  | D | 3711 (398 - 14267)   | 3691 (399 - 14277)   | 4363 (472 - 16732)     | 3711 (397 - 14170)     | 3691 (402 - 14242)     | 4365 (471 - 16765)     |
| Bhutan           | C | 10 (1 - 32)          | 2 (0 - 7)            | 23 (5 - 73)            | 10 (1 - 32)            | 2 (0 - 7)              | 23 (5 - 76)            |
|                  | D | 4 (0 - 14)           | 1 (0 - 4)            | 8 (0 - 31)             | 4 (0 - 15)             | 1 (0 - 4)              | 8 (0 - 32)             |
| Brunei           | C | 13 (2 - 44)          | 5 (0 - 18)           | 18 (4 - 59)            | 13 (2 - 43)            | 5 (0 - 17)             | 18 (4 - 61)            |
|                  | D | 5 (0 - 19)           | 2 (0 - 8)            | 7 (0 - 26)             | 5 (0 - 19)             | 2 (0 - 8)              | 7 (0 - 27)             |
| Cambodia         | C | 509 (89 - 1714)      | 472 (83 - 1594)      | 721 (129 - 2414)       | 705 (221 - 2360)       | 653 (200 - 2178)       | 998 (311 - 3373)       |
|                  | D | 185 (13 - 758)       | 172 (12 - 711)       | 262 (19 - 1075)        | 257 (26 - 957)         | 238 (24 - 894)         | 363 (38 - 1362)        |
| China            | C | 13958 (1959 - 48634) | 13855 (1940 - 48066) | 15796 (2220 - 54883)   | 34432 (10769 - 114096) | 34180 (10697 - 113704) | 38978 (12178 - 129234) |
|                  | D | 5027 (329 - 20587)   | 4991 (325 - 20400)   | 5690 (371 - 23185)     | 12517 (1363 - 47941)   | 12423 (1331 - 47539)   | 14169 (1534 - 54947)   |
| India            | C | 25470 (7864 - 82413) | 13974 (4296 - 45199) | 43783 (13511 - 141331) | 30021 (9263 - 100390)  | 16471 (5083 - 55121)   | 51621 (15985 - 172686) |
|                  | D | 9265 (1007 - 35177)  | 5082 (549 - 19278)   | 15926 (1720 - 60441)   | 10923 (1181 - 42815)   | 5992 (642 - 23454)     | 18782 (2031 - 73583)   |
| Indonesia        | C | 7081 (2204 - 23423)  | 4941 (1544 - 16338)  | 13402 (4170 - 44423)   | 7098 (2209 - 23433)    | 4952 (1539 - 16330)    | 13432 (4182 - 44362)   |
|                  | D | 2575 (279 - 9925)    | 1797 (194 - 6940)    | 4876 (527 - 18768)     | 2582 (282 - 9865)      | 1802 (193 - 6933)      | 4887 (536 - 18801)     |
| Japan            | C | 887 (239 - 2931)     | 855 (229 - 2823)     | 1088 (291 - 3610)      | 1270 (332 - 4229)      | 1224 (318 - 4052)      | 1557 (408 - 5173)      |
|                  | D | 323 (32 - 1251)      | 311 (31 - 1197)      | 396 (40 - 1528)        | 463 (47 - 1782)        | 446 (44 - 1705)        | 567 (58 - 2207)        |
| Laos             | C | 167 (47 - 529)       | 147 (42 - 460)       | 241 (69 - 763)         | 172 (49 - 543)         | 151 (43 - 475)         | 248 (72 - 775)         |
|                  | D | 61 (6 - 229)         | 53 (5 - 201)         | 88 (8 - 329)           | 63 (5 - 235)           | 55 (5 - 206)           | 90 (9 - 337)           |
| Malaysia         | C | 201 (21 - 804)       | 116 (12 - 470)       | 264 (29 - 1051)        | 1029 (322 - 3375)      | 594 (184 - 1962)       | 1349 (422 - 4449)      |
|                  | D | 74 (3 - 370)         | 43 (1 - 215)         | 97 (4 - 479)           | 374 (38 - 1429)        | 216 (22 - 833)         | 491 (52 - 1888)        |
| Myanmar          | C | 1396 (210 - 4689)    | 1261 (189 - 4250)    | 1953 (293 - 6477)      | 1722 (517 - 5831)      | 1555 (466 - 5237)      | 2411 (729 - 8192)      |
|                  | D | 507 (35 - 2013)      | 457 (31 - 1803)      | 709 (50 - 2798)        | 625 (62 - 2306)        | 564 (57 - 2081)        | 874 (88 - 3231)        |
| Nepal            | C | 768 (196 - 2460)     | 436 (112 - 1404)     | 947 (244 - 3031)       | 1266 (398 - 4187)      | 719 (224 - 2368)       | 1562 (494 - 5149)      |
|                  | D | 279 (27 - 1054)      | 159 (14 - 599)       | 345 (33 - 1294)        | 461 (49 - 1735)        | 262 (27 - 989)         | 568 (60 - 2155)        |
| North Korea      | C | 412 (117 - 1300)     | 406 (116 - 1285)     | 449 (128 - 1428)       | 578 (174 - 1927)       | 570 (172 - 1905)       | 631 (190 - 2117)       |
|                  | D | 150 (15 - 571)       | 148 (14 - 570)       | 164 (16 - 626)         | 210 (21 - 822)         | 207 (22 - 805)         | 230 (24 - 888)         |
| Pakistan         | C | 1360 (347 - 4476)    | 530 (135 - 1748)     | 7393 (1899 - 24421)    | 1359 (345 - 4466)      | 530 (134 - 1755)       | 7393 (1906 - 24352)    |
|                  | D | 495 (47 - 1970)      | 193 (17 - 760)       | 2691 (258 - 10633)     | 495 (47 - 1957)        | 193 (18 - 776)         | 2692 (262 - 10615)     |
| Papua New Guinea | C | 154 (36 - 513)       | 1 (0 - 5)            | 335 (83 - 1148)        | 154 (36 - 516)         | 1 (0 - 5)              | 335 (81 - 1128)        |
|                  | D | 56 (5 - 219)         | 0 (0 - 3)            | 122 (11 - 478)         | 56 (5 - 217)           | 0 (0 - 3)              | 122 (11 - 478)         |
| Philippines      | C | 3899 (1199 - 12450)  | 3715 (1148 - 11788)  | 5290 (1630 - 16832)    | 3900 (1211 - 12438)    | 3715 (1145 - 11830)    | 5292 (1628 - 16794)    |
|                  | D | 1422 (149 - 5508)    | 1355 (140 - 5244)    | 1930 (201 - 7463)      | 1423 (147 - 5533)      | 1355 (139 - 5278)      | 1930 (200 - 7501)      |
| Singapore        | C | 68 (18 - 215)        | 65 (17 - 207)        | 106 (29 - 334)         | 68 (18 - 213)          | 65 (17 - 205)          | 106 (29 - 337)         |
|                  | D | 25 (2 - 98)          | 24 (2 - 96)          | 39 (3 - 151)           | 25 (2 - 99)            | 24 (2 - 94)            | 39 (3 - 153)           |
| South Korea      | C | 207 (56 - 675)       | 189 (51 - 615)       | 242 (66 - 776)         | 917 (282 - 2974)       | 839 (260 - 2760)       | 1072 (331 - 3526)      |

|             |   |      |              |      |              |      |              |      |                |      |                |      |                |
|-------------|---|------|--------------|------|--------------|------|--------------|------|----------------|------|----------------|------|----------------|
| Sri Lanka   | D | 75   | (7 - 286)    | 69   | (6 - 260)    | 88   | (8 - 331)    | 334  | (35 - 1271)    | 305  | (32 - 1151)    | 389  | (41 - 1466)    |
|             | C | 34   | (8 - 105)    | 12   | (2 - 39)     | 152  | (44 - 482)   | 129  | (38 - 427)     | 46   | (13 - 148)     | 582  | (180 - 1921)   |
| Taiwan      | D | 12   | (0 - 47)     | 4    | (0 - 18)     | 55   | (5 - 208)    | 47   | (4 - 183)      | 17   | (1 - 65)       | 212  | (21 - 822)     |
|             | C | 19   | (4 - 60)     | 19   | (4 - 60)     | 44   | (11 - 140)   | 217  | (66 - 706)     | 215  | (66 - 701)     | 504  | (156 - 1662)   |
| Thailand    | D | 7    | (0 - 27)     | 7    | (0 - 27)     | 16   | (1 - 62)     | 79   | (8 - 303)      | 78   | (8 - 303)      | 183  | (19 - 713)     |
|             | C | 356  | (88 - 1181)  | 331  | (82 - 1096)  | 704  | (175 - 2339) | 1165 | (363 - 3843)   | 1082 | (337 - 3565)   | 2301 | (723 - 7589)   |
| Timor-Leste | D | 130  | (11 - 537)   | 121  | (11 - 502)   | 257  | (23 - 1064)  | 424  | (44 - 1624)    | 393  | (41 - 1525)    | 837  | (91 - 3231)    |
|             | C | 7    | (1 - 22)     | 5    | (0 - 17)     | 37   | (8 - 118)    | 7    | (0 - 22)       | 5    | (0 - 17)       | 37   | (8 - 119)      |
| Vietnam     | D | 2    | (0 - 11)     | 2    | (0 - 8)      | 13   | (0 - 54)     | 2    | (0 - 10)       | 2    | (0 - 8)        | 14   | (0 - 53)       |
|             | C | 1726 | (408 - 5622) | 1706 | (406 - 5537) | 2171 | (520 - 7048) | 3950 | (1241 - 12994) | 3905 | (1222 - 12860) | 4966 | (1554 - 16410) |
|             | D | 628  | (58 - 2423)  | 621  | (55 - 2395)  | 790  | (71 - 3050)  | 1437 | (155 - 5505)   | 1420 | (153 - 5497)   | 1805 | (197 - 6975)   |
