# Supplementary material for: The current burden of Japanese encephalitis and the estimated impacts of vaccination: Combining estimates of the spatial distribution and transmission intensity of a zoonotic pathogen
Source: PubMed Central journal article supplement (PMC8544850; doi:10.1371/journal.pntd.0009385), 2021-10-13
Supplement: pntd.0009385.s004.pdf [file pntd.0009385.s004.pdf]

**Table S4. Locations of documented Japanese encephalitis (JE) occurrence from 2000 to 2019.** Latitude and longitude were estimated from the location name provided using Google Maps.

| Country | ISO L1 | ISO L2     | Location                               | Lat    | Long    | Study period           | Reference |
|---------|--------|------------|----------------------------------------|--------|---------|------------------------|-----------|
|         |        |            | Tin Shui Wai,<br>Yuen Long<br>District | 22.461 | 114.003 | 5/10/2017 - 5/10/2017  | [3]       |
| IND     | IN-TG  | Karimnagar | Uppal                                  | 18.182 | 79.488  | 7/1/2003 - 7/31/2003   | [4]       |
| IND     | IN-TG  | Warangal   | Medipathi                              | 18.054 | 79.452  | 7/1/2003 - 7/31/2003   | [4]       |
| IND     | IN-HR  | Ambala     | Machonda                               | 30.306 | 76.833  | 9/15/2003 - 11/30/2003 | [12]      |
| IND     | IN-HR  | Ambala     | Hari Nagar                             | 30.353 | 76.820  | 9/15/2003 - 11/30/2003 | [12]      |
| IND     | IN-HR  | Ambala     | Dadupur                                | 30.220 | 77.006  | 9/15/2003 - 11/30/2003 | [12]      |
| IND     | IN-HR  | Ambala     | Dulyana                                | 30.282 | 77.091  | 9/15/2003 - 11/30/2003 | [12]      |
| IND     | IN-HR  | Ambala     | Manglai                                | 30.309 | 76.908  | 9/15/2003 - 11/30/2003 | [12]      |
| IND     | IN-HR  | Ambala     | Baldev Nagar                           | 30.397 | 76.801  | 9/15/2003 - 11/30/2003 | [12]      |
| IND     | IN-HR  | Ambala     | Dukhedi                                | 30.282 | 76.881  | 9/15/2003 - 11/30/2003 | [12]      |
|         |        |            | Manmohan<br>Nagar                      | 30.397 | 76.779  | 9/15/2003 - 11/30/2003 | [12]      |
| IND     | IN-HR  | Ambala     | Durana                                 | 30.231 | 76.801  | 9/15/2003 - 11/30/2003 | [12]      |
| IND     | IN-HR  | Ambala     | Bullana                                | 30.321 | 76.727  | 9/15/2003 - 11/30/2003 | [12]      |
| IND     | IN-HR  | Ambala     | Mirzapur                               | 30.278 | 76.774  | 9/15/2003 - 11/30/2003 | [12]      |
| IND     | IN-AS  | Dibrugarh  | Barbaruah                              | 27.402 | 94.881  | 1/1/2009 - 12/31/2010  | [2]       |
| IND     | IN-AS  | Dibrugarh  | Lahoal                                 | 27.452 | 95.002  | 1/1/2009 - 12/31/2010  | [2]       |
| IND     | IN-KL  | Alappuzha  | Muhamma                                | 9.602  | 76.350  | 5/1/2011 - 5/31/2011   | [16]      |
| IND     | IN-KL  | Alappuzha  | Pollathai                              | 9.573  | 76.307  | 5/1/2011 - 5/31/2011   | [16]      |
|         |        |            | JJ Colony,<br>Bawana                   | 28.807 | 77.053  | 9/15/2011 - 9/15/2011  | [13]      |
| IND     | IN-KL  | Alappuzha  | Thycattusery                           | 9.773  | 76.345  | 9/1/2012 - 10/31/2012  | [1]       |
| IND     | IN-KL  | Alappuzha  | Pattanakkad                            | 9.729  | 76.316  | 9/1/2012 - 10/31/2012  | [1]       |
| IND     | IN-KL  | Alappuzha  | Kanjikuzhi                             | 9.622  | 76.335  | 9/1/2012 - 10/31/2012  | [1]       |
| IND     | IN-KL  | Alappuzha  | Aryad                                  | 9.545  | 76.347  | 9/1/2012 - 10/31/2012  | [1]       |
| IND     | IN-KL  | Alappuzha  | Ambalapuzha                            | 9.380  | 76.361  | 9/1/2012 - 10/31/2012  | [1]       |
|         |        |            | Alappuzha<br>municipality              | 9.503  | 76.341  | 9/1/2012 - 10/31/2012  | [1]       |
| IND     | IN-KL  | Alappuzha  | Chambakulam                            | 9.407  | 76.404  | 9/1/2012 - 10/31/2012  | [1]       |
| IND     | IN-KL  | Alappuzha  | Veliyanad                              | 9.449  | 76.466  | 9/1/2012 - 10/31/2012  | [1]       |
| IND     | IN-KL  | Alappuzha  | Chengannur                             | 9.320  | 76.611  | 9/1/2012 - 10/31/2012  | [1]       |
| IND     | IN-KL  | Alappuzha  | Haripad                                | 9.284  | 76.448  | 9/1/2012 - 10/31/2012  | [1]       |
| IND     | IN-KL  | Alappuzha  | Mavelikkara                            | 9.244  | 76.538  | 9/1/2012 - 10/31/2012  | [1]       |
| IND     | IN-KL  | Alappuzha  | Bharanikkavu                           | 9.176  | 76.542  | 9/1/2012 - 10/31/2012  | [1]       |
| IND     | IN-KL  | Alappuzha  | Muthukulam                             | 9.215  | 76.458  | 9/1/2012 - 10/31/2012  | [1]       |
| IND     | IN-OR  | Malkangiri | Uskapalli                              | 18.252 | 82.017  | 9/16/2012 - 11/2/2012  | [5]       |
|         |        |            | Charkiguda and<br>Pradhaniguda         | 18.329 | 81.802  | 9/16/2012 - 11/2/2012  | [5]       |
| IND     | IN-OR  | Malkangiri | Pradhaniguda                           | 18.329 | 81.802  | 9/16/2012 - 11/2/2012  | [5]       |
| IND     | IN-TN  | Thanjavur  | Kovilur                                | 10.588 | 79.249  | 2/1/2011 - 10/31/2013  | [14]      |
| IND     | IN-TN  | Thanjavur  | Naduvakottai                           | 10.430 | 79.261  | 2/1/2011 - 10/31/2013  | [14]      |

|     |       |                |                  |        |        |                       |      |
|-----|-------|----------------|------------------|--------|--------|-----------------------|------|
| IND | IN-TN | Thanjavur      | Kakkaraikottai   | 10.601 | 79.216 | 2/1/2011 - 10/31/2013 | [14] |
|     |       |                | Urantharayankud  |        |        |                       |      |
| IND | IN-TN | Thanjavur      | ikadu            | 10.585 | 79.269 | 2/1/2011 - 10/31/2013 | [14] |
|     |       |                | Thiruvaidaimarut |        |        |                       |      |
| IND | IN-TN | Thanjavur      | hur              | 10.997 | 79.454 | 2/1/2011 - 10/31/2013 | [14] |
| IND | IN-TN | Thanjavur      | Muthur           | 10.907 | 79.457 | 2/1/2011 - 10/31/2013 | [14] |
| IND | IN-WB | Koch Bihar     | Koch Bihar       | 26.344 | 89.451 | 6/1/2014 - 9/10/2014  | [7]  |
| IND | IN-WB | Alipurduar     | Alipurduar       | 26.489 | 89.535 | 6/1/2014 - 9/10/2014  | [7]  |
| IND | IN-WB | Koch Bihar     | Dinhata          | 26.131 | 89.466 | 6/1/2014 - 9/10/2014  | [7]  |
| IND | IN-WB | Koch Bihar     | Bakshikhamar     | 26.035 | 89.531 | 6/1/2014 - 9/10/2014  | [7]  |
| IND | IN-WB | Koch Bihar     | Tufanganj        | 26.318 | 89.658 | 6/1/2014 - 9/10/2014  | [7]  |
| IND | IN-WB | Alipurduar     | Simlabari        | 26.599 | 89.691 | 6/1/2014 - 9/10/2014  | [7]  |
| IND | IN-WB | Koch Bihar     | Sitalkuchi       | 26.169 | 89.181 | 6/1/2014 - 9/10/2014  | [7]  |
| IND | IN-WB | Koch Bihar     | Nishiganj        | 26.314 | 89.302 | 6/1/2014 - 9/10/2014  | [7]  |
| IND | IN-WB | Koch Bihar     | Mathabhanga      | 26.343 | 89.213 | 6/1/2014 - 9/10/2014  | [7]  |
| IND | IN-WB | Koch Bihar     | Balasi           | 26.427 | 89.182 | 6/1/2014 - 9/10/2014  | [7]  |
| IND | IN-WB | Alipurduar     | Silbarihat       | 26.498 | 89.344 | 6/1/2014 - 9/10/2014  | [7]  |
| IND | IN-WB | Japaiguri      | Salbari          | 26.544 | 89.107 | 6/1/2014 - 9/10/2014  | [7]  |
| IND | IN-WB | Koch Bihar     | Daribas          | 26.302 | 88.870 | 6/1/2014 - 9/10/2014  | [7]  |
| IND | IN-WB | Koch Bihar     | Haldibari        | 26.333 | 88.780 | 6/1/2014 - 9/10/2014  | [7]  |
| IND | IN-WB | Japaiguri      | Jalpaiguri       | 26.522 | 88.718 | 6/1/2014 - 9/10/2014  | [7]  |
| IND | IN-WB | Japaiguri      | Maynaguri        | 26.575 | 88.822 | 6/1/2014 - 9/10/2014  | [7]  |
| IND | IN-WB | Japaiguri      | Gairkata         | 26.704 | 89.024 | 6/1/2014 - 9/10/2014  | [7]  |
| IND | IN-WB | Japaiguri      | Banarhat         | 26.792 | 89.030 | 6/1/2014 - 9/10/2014  | [7]  |
| IND | IN-WB | Japaiguri      | Nagrakata        | 26.882 | 88.909 | 6/1/2014 - 9/10/2014  | [7]  |
| IND | IN-WB | Japaiguri      | Mal Bazar        | 26.862 | 88.751 | 6/1/2014 - 9/10/2014  | [7]  |
| IND | IN-WB | Japaiguri      | Fatakpur         | 26.567 | 88.537 | 6/1/2014 - 9/10/2014  | [7]  |
| IND | IN-WB | Darjiling      | Darjeeling       | 27.041 | 88.266 | 6/1/2014 - 9/10/2014  | [7]  |
| IND | IN-WB | Darjiling      | Khoribari        | 26.554 | 88.191 | 6/1/2014 - 9/10/2014  | [7]  |
| IND | IN-WB | Darjiling      | Bagdogra         | 26.698 | 88.315 | 6/1/2014 - 9/10/2014  | [7]  |
| IND | IN-WB | Darjiling      | Siliguri         | 26.728 | 88.394 | 6/1/2014 - 9/10/2014  | [7]  |
| IND | IN-WB | Darjiling      | Belgachi         | 26.755 | 88.233 | 6/1/2014 - 9/10/2014  | [7]  |
| IND | IN-WB | Darjiling      | Dudhia           | 26.820 | 88.245 | 6/1/2014 - 9/10/2014  | [7]  |
| IND | IN-WB | Uttar Dinajpur | Bhagabati        | 26.379 | 88.299 | 6/1/2014 - 9/10/2014  | [7]  |
| IND | IN-WB | Uttar Dinajpur | Lalbazar         | 26.397 | 88.432 | 6/1/2014 - 9/10/2014  | [7]  |
| IND | IN-WB | Uttar Dinajpur | Islampur         | 26.262 | 88.194 | 6/1/2014 - 9/10/2014  | [7]  |
| IND | IN-WB | Uttar Dinajpur | Raskora          | 26.002 | 88.043 | 6/1/2014 - 9/10/2014  | [7]  |
| IND | IN-WB | Uttar Dinajpur | Raiganj          | 25.611 | 88.134 | 6/1/2014 - 9/10/2014  | [7]  |
| IND | IN-WB | Uttar Dinajpur | Bangalbari       | 25.621 | 88.226 | 6/1/2014 - 9/10/2014  | [7]  |
| IND | IN-WB | Uttar Dinajpur | Kaliyaganj       | 25.641 | 88.331 | 6/1/2014 - 9/10/2014  | [7]  |

|     |       |                     |                           |        |         |                         |      |
|-----|-------|---------------------|---------------------------|--------|---------|-------------------------|------|
| IND | IN-WB | Dakshin<br>Dinajpur | Balurghat                 | 25.230 | 88.787  | 6/1/2014 - 9/10/2014    | [7]  |
| IND | IN-WB | Dakshin<br>Dinajpur | Gangarampur               | 25.408 | 88.523  | 6/1/2014 - 9/10/2014    | [7]  |
| IND | IN-WB | Uttar Dinajpur      | Mahindra                  | 25.434 | 88.267  | 6/1/2014 - 9/10/2014    | [7]  |
| JPN | JP-34 | Hatsukaichi         | Otake                     | 34.299 | 132.222 | 8/1/1999 - 10/31/2002   | [10] |
| JPN | JP-34 | Fukuyama            | Fukuyama                  | 34.492 | 133.334 | 8/1/1999 - 10/31/2002   | [10] |
| JPN | JP-34 | Shobara             | Kuchiwacho<br>Nagata      | 34.891 | 132.923 | 8/1/1999 - 10/31/2002   | [10] |
| JPN | JP-34 | Miyoshi             | Mirasakacho<br>Nika       | 34.788 | 132.971 | 8/1/1999 - 10/31/2002   | [10] |
| KOR | KR-41 |                     | Pyeongtaek                | 36.992 | 127.113 | 9/25/2008 - 9/25/2008   | [15] |
| KOR | KR-28 |                     | Namdong                   | 37.453 | 126.730 | 9/25/2008 - 9/25/2008   | [15] |
| KOR | KR-47 |                     | Goryeong                  | 35.733 | 128.274 | 10/13/2008 - 10/13/2008 | [15] |
| KOR | KR-41 |                     | Yangju                    | 37.783 | 127.043 | 9/20/2010 - 9/20/2010   | [15] |
| KOR | KR-41 |                     | Yeoju                     | 37.288 | 127.633 | 9/27/2010 - 9/27/2010   | [15] |
| KOR | KR-42 |                     | Hwacheon                  | 38.113 | 127.698 | 10/21/2010 - 10/21/2010 | [15] |
| KOR | KR-41 |                     | Pyeongtaek                | 36.992 | 127.113 | 8/29/2012 - 8/29/2012   | [15] |
| KOR | KR-41 |                     | Iansan                    | 37.315 | 126.823 | 8/19/2013 - 8/19/2013   | [15] |
| KOR | KR-41 |                     | Hwaseong                  | 37.199 | 126.827 | 9/11/2014 - 9/11/2014   | [15] |
| KOR | KR-27 |                     | Dalseong                  | 35.780 | 128.428 | 9/22/2014 - 9/22/2014   | [15] |
| KOR | KR-41 |                     | Suwon                     | 37.265 | 127.028 | 9/8/2015 - 9/8/2015     | [15] |
| KOR | KR-11 |                     | Yongsan                   | 37.533 | 126.985 | 10/20/2016 - 10/20/2016 | [15] |
| KOR | KR-41 |                     | Paju                      | 37.758 | 126.778 | 10/29/2016 - 10/29/2016 | [15] |
| KOR | KR-41 | Dongducheon         | Camp Casey<br>Dongducheon | 37.921 | 127.058 | 7/1/2008 - 10/31/2011   | [6]  |
| LAO | LA-VT |                     | Vientiane                 | 18.001 | 102.542 | 1/1/2006 - 3/31/2006    | [17] |
| LAO | LA-VT |                     | Vientiane                 | 17.985 | 102.551 | 1/1/2006 - 3/31/2006    | [17] |
| LAO | LA-VT |                     | Vientiane                 | 17.974 | 102.600 | 1/1/2006 - 3/31/2006    | [17] |
| LAO | LA-VT |                     | Vientiane                 | 17.959 | 102.616 | 1/1/2006 - 3/31/2006    | [17] |
| LAO | LA-VT |                     | Vientiane                 | 18.009 | 102.611 | 1/1/2006 - 3/31/2006    | [17] |
| LAO | LA-VT |                     | Vientiane                 | 18.001 | 102.617 | 1/1/2006 - 3/31/2006    | [17] |
| LAO | LA-VT |                     | Vientiane                 | 18.023 | 102.610 | 1/1/2006 - 3/31/2006    | [17] |
| LAO | LA-VT |                     | Vientiane                 | 17.901 | 102.634 | 1/1/2006 - 3/31/2006    | [17] |
| LAO | LA-VT |                     | Vientiane                 | 17.900 | 102.640 | 1/1/2006 - 3/31/2006    | [17] |
| LAO | LA-KH |                     | Thalang                   | 17.844 | 105.053 | 5/1/2007 - 2/28/2008    | [8]  |
| LAO | LA-KH |                     | SopPhene                  | 17.836 | 105.049 | 5/1/2007 - 2/28/2008    | [8]  |
| LAO | LA-KH |                     | Sophia                    | 17.808 | 105.053 | 5/1/2007 - 2/28/2008    | [8]  |
| LAO | LA-KH |                     | NonBouakham               | 17.820 | 105.048 | 5/1/2007 - 2/28/2008    | [8]  |
| LAO | LA-KH |                     | NakaNeua                  | 17.760 | 105.113 | 5/1/2007 - 2/28/2008    | [8]  |
| LAO | LA-KH |                     | NakaiTai                  | 17.773 | 105.089 | 5/1/2007 - 2/28/2008    | [8]  |
| LAO | LA-KH |                     | Namnian                   | 17.790 | 105.066 | 5/1/2007 - 2/28/2008    | [8]  |
| LAO | LA-KH |                     | Oudomsouk                 | 17.708 | 105.147 | 5/1/2007 - 2/28/2008    | [8]  |
| LAO | LA-KH |                     | Phonphanpaek              | 17.703 | 105.170 | 5/1/2007 - 2/28/2008    | [8]  |
| MYS | MY-07 | Timur Laut          | George Town               | 5.416  | 100.319 | 1/1/2014 - 12/31/2014   | [9]  |

|     |        |                |               |         |         |                       |      |
|-----|--------|----------------|---------------|---------|---------|-----------------------|------|
|     |        | Seberang Perai |               |         |         |                       |      |
| MYS | MY-07  | Utara          | Bagan Jermal  | 5.415   | 100.374 | 1/1/2014 - 12/31/2014 | [9]  |
|     |        | Seberang Perai |               |         |         |                       |      |
| MYS | MY-07  | Utara          | Tasek Gelugor | 5.478   | 100.490 | 1/1/2014 - 12/31/2014 | [9]  |
| PNG | PG-MBA | Alotau         | Alatau        | -10.313 | 150.462 | 1/1/2000 - 12/31/2001 | [11] |

---

---

## References

1. Balakrishnan, Anukumar, Romy Jose Thekkekkare, Gajanan Sapkal, and Babasaheb V. Tandale. "Seroprevalence of Japanese Encephalitis Virus & West Nile Virus in Alappuzha District, Kerala." *The Indian Journal of Medical Research* 146, no. Suppl 1 (July 2017): S70–76. [https://doi.org/10.4103/ijmr.IJMR\\_1638\\_15](https://doi.org/10.4103/ijmr.IJMR_1638_15).
2. Borah, J., P. Dutta, S. A. Khan, and J. Mahanta. "Epidemiological Concordance of Japanese Encephalitis Virus Infection among Mosquito Vectors, Amplifying Hosts and Humans in India." *Epidemiology & Infection* 141, no. 1 (2013): 74–80.
3. Cheng, Vincent CC, Siddharth Sridhar, Shuk-Ching Wong, Sally CY Wong, Jasper FW Chan, Cyril CY Yip, Chi-Hung Chau, Timmy WK Au, Yu-Yan Hwang, and Carol SW Yau. "Japanese Encephalitis Virus Transmitted via Blood Transfusion, Hong Kong, China." *Emerging Infectious Diseases* 24, no. 1 (2018): 49.
4. Das, Bina Pani, Shiv Lal, and V. K. Saxena. "Outdoor Resting Preference of *Culex Tritaeniorhynchus*, the Vector of Japanese Encephalitis in Warangal and Karim Nagar Districts, Andhra Pradesh." *Journal of Vector Borne Diseases* 41, no. 1/2 (2004): 32.
5. Dwibedi, Bhagirathi, Namita Mohapatra, Sushil Kumar Rathore, Maheswar Panda, Satya Sundar Pati, Jyotsnamayee Sabat, Bandana Thakur, Sailendra Panda, and Shantanu Kumar Kar. "An Outbreak of Japanese Encephalitis after Two Decades in Odisha, India." *The Indian Journal of Medical Research* 142, no. Suppl 1 (2015): S30.
6. Eick-Cost, Angelia A., Zheng Hu, Terry A. Klein, Robert J. Putnak, and Richard G. Jarman. "Seroconversion to Japanese Encephalitis Virus among US Infantry Forces in Korea." *The American Journal of Tropical Medicine and Hygiene* 93, no. 5 (2015): 1052.
7. Gurav, Yogesh K., Vijay P. Bondre, Babasaheb V. Tandale, Rekha G. Damle, Sanjay Mallick, Uday S. Ghosh, and Shankha S. Nag. "A Large Outbreak of Japanese Encephalitis Predominantly among Adults in Northern Region of West Bengal, India." *Journal of Medical Virology* 88, no. 11 (2016): 2004–11.
8. Hiscox, Alexandra, Christian H. Winter, Phengta Vongphrachanh, Thongchanh Sisouk, Virasack Somoulay, Samlane Phompida, Surinder Kaul, Pany Sananikhom, Nguyen Thi Yen, and Richard E. Paul. "Serological Investigations of Flavivirus Prevalence in Khammouane Province, Lao People's Democratic Republic, 2007–2008." *The American Journal of Tropical Medicine and Hygiene* 83, no. 5 (2010): 1166.
9. Kumar, Kiven, Siti Suri Arshad, Gayathri Thevi Selvarajah, Jalila Abu, Ooi Peck Toung, Yusuf Abba, A. R. Yasmin, Faruku Bande, Reuben Sharma, and Bee Lee Ong. "Japanese Encephalitis in Malaysia: An Overview and Timeline." *Acta Tropica* 185 (2018): 219–29.
10. Kuwayama, Masaru, Mikako Ito, Shinichi Takao, Yukie Shimazu, Shinji Fukuda, Kazuo Miyazaki, Ichiro Kurane, and Tomohiko Takasaki. "Japanese Encephalitis Virus in Meningitis Patients, Japan." *Emerging Infectious Diseases* 11, no. 3 (March 2005): 471–73. <https://doi.org/10.3201/eid1103.040285>.
11. Mackenzie, J. S., K. B. Chua, P. W. Daniels, B. T. Eaton, H. E. Field, R. A. Hall, K. Halpin, C. A. Johansen, P. D. Kirkland, and S. K. Lam. "Emerging Viral Diseases of Southeast Asia and the Western Pacific." *Emerging Infectious Diseases* 7, no. 3 Suppl (2001): 497.
12. Rao, P., K. Joshi, B. Mishra, R. K. Ratho, and R. Kumar. "An Outbreak of Japanese Encephalitis in Haryana." *The Journal of Communicable Diseases* 37, no. 1 (March 2005): 78–81.

13. Routray, D., J. R. Sahoo, P. Singh, A. Agarwal, S. K. Jain, and S. V. Singh. "Public Health Response to the First Case of Japanese Encephalitis in Delhi, 2011." *The Journal of Communicable Diseases* 44, no. 3 (2012): 157–61.
14. Samuel, P. Philip, V. Thenmozhi, M. Muniaraj, D. Ramesh, S. Victor Jerald Leo, T. Balaji, K. Venkatasubramani, J. Nagaraj, and R. Paramasivan. "Changing Paradigm in the Epidemiology of Japanese Encephalitis in a Non-Endemic Region." *Journal of Vector Borne Diseases* 55, no. 3 (July 1, 2018): 203. <https://doi.org/10.4103/0972-9062.249130>.
15. Shin, Een-Suk, Ok Park, and In-Sik Kong. "Review of the Incidence of Japanese Encephalitis in Foreign-Born and Korean Nationals Living in the Republic of Korea, 2007–2016." *Osong Public Health and Research Perspectives* 9, no. 3 (2018): 126.
16. Thenmozhi, V., R. Paramasivan, P. Philip Samuel, T. Kamaraj, T. Balaji, K. J. Dhananjeyan, K. Venkatasubramani, and B. K. Tyagi. "Dual Infection in Human by Japanese Encephalitis Virus & Chikungunya Virus in Alappuzha District, Kerala, India." *The Indian Journal of Medical Research* 138, no. 3 (2013): 362.
17. Vallée, Julie, Audrey Dubot-Pérès, Phonepaseth Ounaphom, Chantalay Sayavong, Juliet E. Bryant, and Jean-Paul Gonzalez. "Spatial Distribution and Risk Factors of Dengue and Japanese Encephalitis Virus Infection in Urban Settings: The Case of Vientiane, Lao PDR." *Tropical Medicine & International Health* 14, no. 9 (2009): 1134–42.
